# Supplementary material for: From biomass to batteries: the contribution of silicon–carbon composites prepared from high-nitrogen egg whites and micron-sized silica powder to lithium-ion battery performance
Source: Royal Society of Chemistry journal article supplement (doi:10.1039/d4nj01316f), 2024-01-01
Supplement: d4nj01316f1.pdf [file d4nj01316f1.pdf]

Supporting Information

## From Biomass to Batteries: The Contribution of Silicon-Carbon Composites Prepared from High-Nitrogen Egg Whites and Micron-Sized Silica Powder to Lithium-Ion Battery Performance

College of Materials Science and Metallurgy Engineering, Guizhou University,  
Guiyang 550025, China

E-mail: [my99email@163.com](mailto:my99email@163.com)

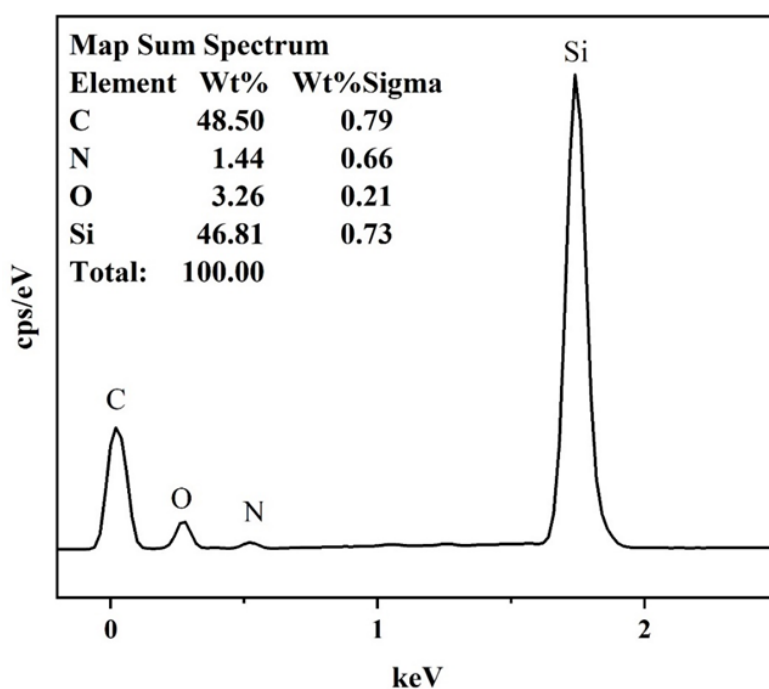

S1. Analysis of EDS element content on Si-N-PC material surface.

**Table.1 Experimental materials and reagents**

| Name (chemical formula/abbreviation)                | Purity level  | Manufacturer                                                            |
|-----------------------------------------------------|---------------|-------------------------------------------------------------------------|
| CR2032 battery case                                 | 99.9%         | Shenzhen Bonap Technology Co., Ltd.                                     |
| Lithium metal sheet (Li)                            | Battery grade | Guangdong Candlelight New Energy Technology Co., Ltd.                   |
| Diaphragm                                           | Battery grade | Suzhou Duoduo Chemical Technology Co., Ltd.                             |
| Electrolyte                                         | battery grade | Suzhou Duoduo Chemical Technology Co., Ltd.                             |
| Gasket                                              | Battery grade | Shenzhen Bonap Technology Co., Ltd.                                     |
| Shrapnel                                            | Battery grade | Shenzhen Bonap Technology Co., Ltd.                                     |
| Dimethyl carbonate (DMC)                            | 99.9%         | Guangdong Candlelight New Energy Technology Co., Ltd.                   |
| Deionized water (DI)                                | -             | Guizhou University Key Laboratory of High Performance Battery Materials |
| Absolute ethanol (C <sub>2</sub> H <sub>5</sub> OH) | AR            | Sinopharm Chemical Reagent Co., Ltd.                                    |
| Acetylene black                                     | Battery grade | Guangdong Candlelight New Energy Technology Co., Ltd.                   |
| Unidirectional copper foil (Cu)                     | Battery grade | Aladdin Reagents Ltd.                                                   |
| Micron silicon (PMSi)                               | 99.9%         | Xinai Metal Materials Co., Ltd.                                         |
| Egg                                                 | -             | Walmart Supermarket (Guiyang Jiaxiu South Store)                        |
| Hydrochloric acid (HCl)                             | AR            | Chuangdong Chemical Industry Group                                      |
| Argon (AR)                                          | 99.9%         | Guiyang Shenjian Gas Co., Ltd.                                          |
| Sodium alginate (SA)                                | AR            | Aladdin Reagents Ltd.                                                   |

Remark:

**1. The amount of electrolyte used (45 microliters); 2. The lithium sheet specification is 16\*0.6mm - purity 99.95%;**

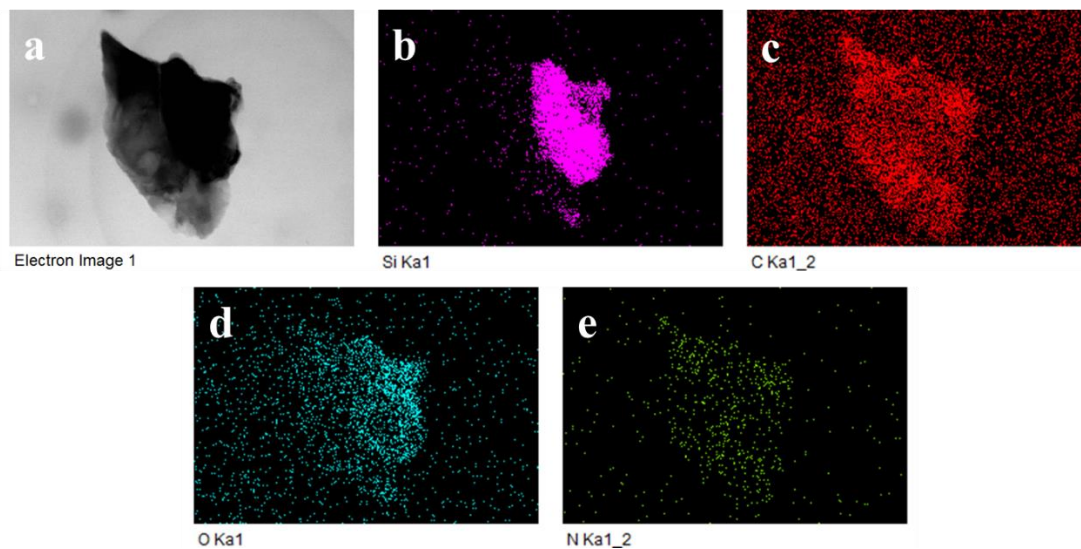

**S2. (a) TEM image of a random position of Si-N-PC composite material (b-e) TEM EDS mapping pattern of the elements (Si, C, O, N) contained in this position.**

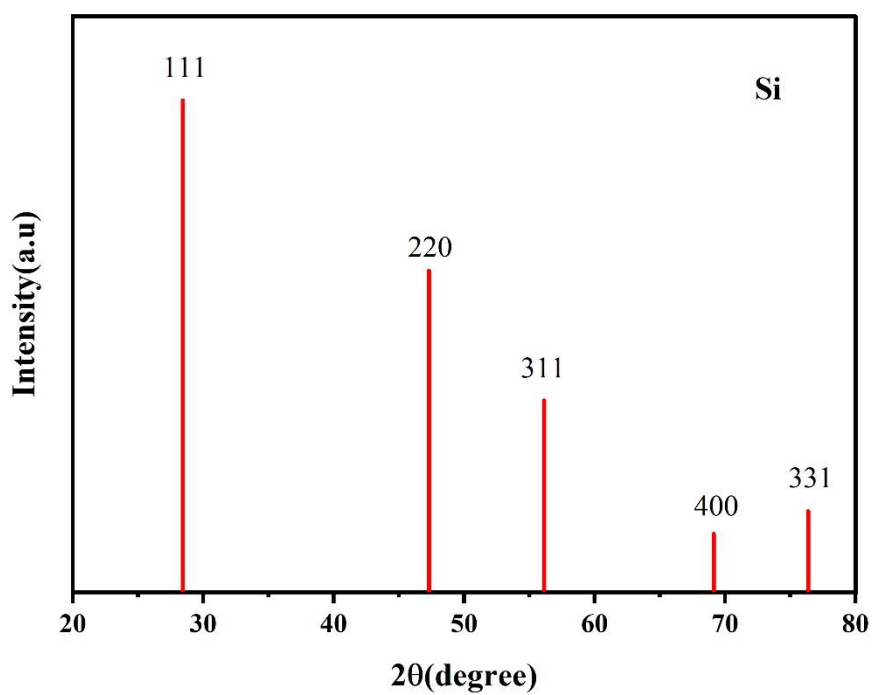

**S3. Standard reference data pattern of silicon in XRD pattern.**

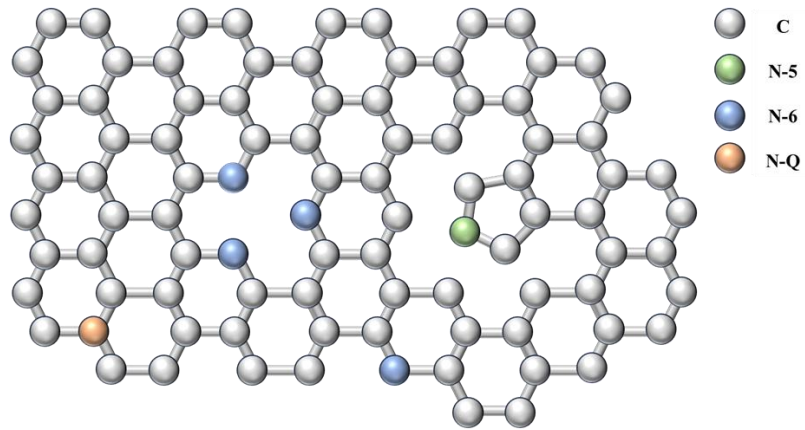

**S4. The structural form of N in the carbon layer of Si-N-PC material.**

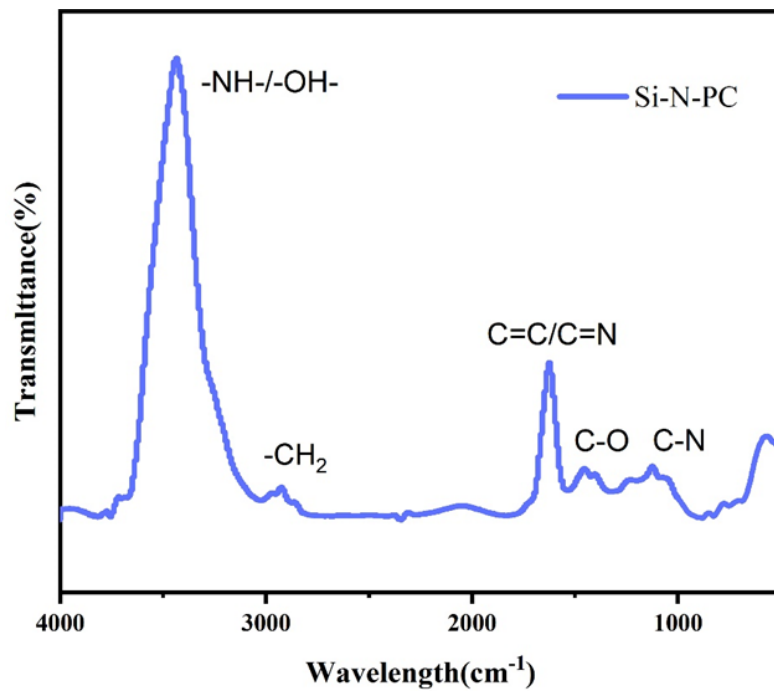

**S5. Fourier transform infrared spectroscopy was used to analyze the existence of functional groups on the surface of Si-N-PC materials.**

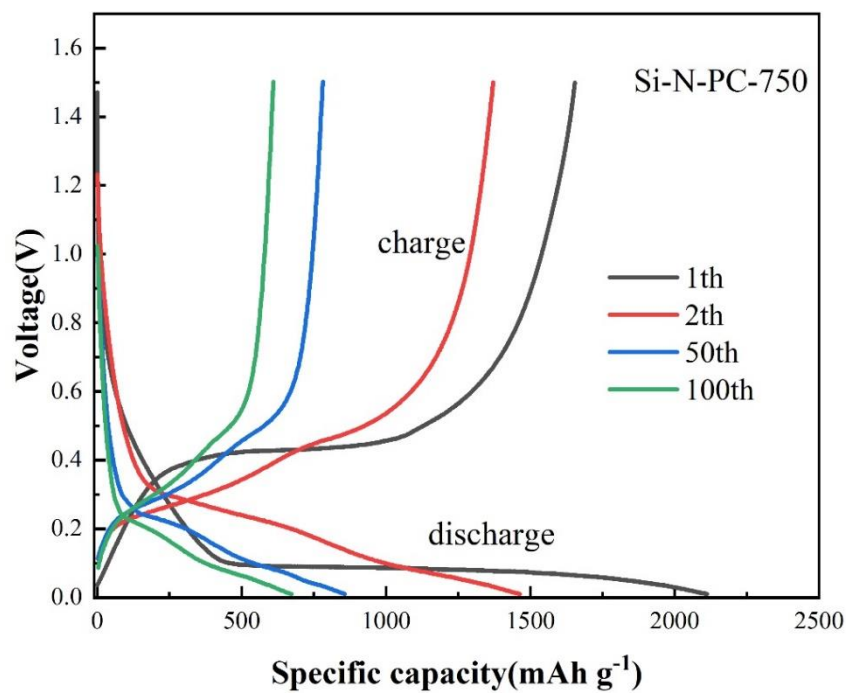

**S6. Analysis of the charge and discharge curve of Si-N-PC material from the first cycle to the 100th cycle.**

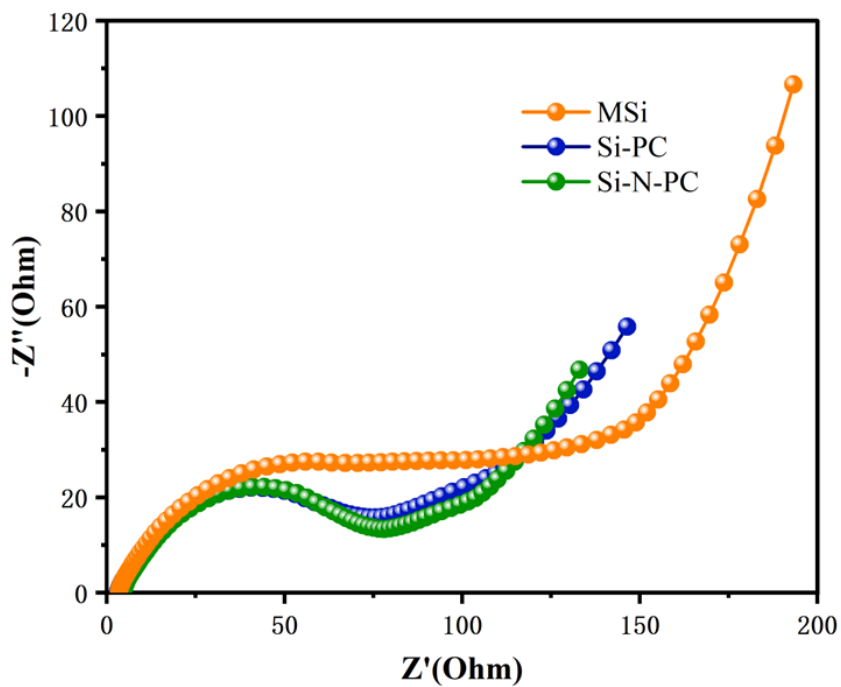

**S7. EIS spectra of MSi,,Si-PC, Si-N-PC electrode materials after one cycle.**

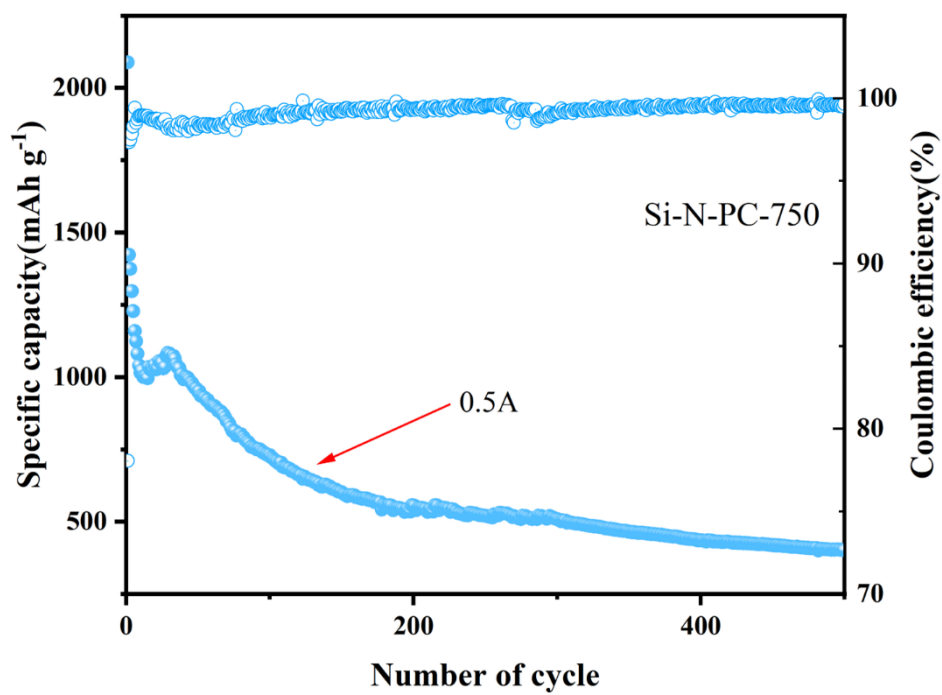

S8. Long cycle curve of Si-N-PC-750 electrode material at current density of 0.5A g<sup>-1</sup>.
